# Supplementary material for: Neutral Poly-/perfluoroalkyl Substances in Air and Snow from the Arctic
Source: PubMed Central journal article supplement (PMC4352854; doi:10.1038/srep08912), 2015-03-09
Supplement: srep08912-s1.pdf [file srep08912-s1.pdf]

# Neutral Poly-/perfluoroalkyl Substances in Air and Snow from the Arctic

Zhiyong Xie<sup>1\*</sup>, Zhen Wang<sup>1,2</sup>, Wenying Mi<sup>1</sup>, Axel Möller<sup>1</sup>, Hendrik Wolschke<sup>1</sup>, Ralf Ebinghaus<sup>1</sup>

<sup>1</sup>Helmholtz-Zentrum Geesthacht, Centre for Materials and Coastal Research, Institute of Coastal Research, Department for Environmental Chemistry, Geesthacht, 21502, Germany

<sup>2</sup>National Marine Environmental Monitoring Center, Dalian 116023, China

\*Corresponding author. Phone: +49-4152-872330; Fax: +49-4152-872332;

e-mail: [zhiyong.xie@hzg.de](mailto:zhiyong.xie@hzg.de)

**Total: 19 pages, 6 tables and 5 figures**

**S1.** Instrumental analysis parameters for the 12 PFASs

**S2.** Calculation of air-seawater gas exchange fluxes of the 12 PFASs

**Table S1.** Full names, acronyms, Chemical Abstract System (CAS) numbers, molecular weight (MW), structure, method detection limits (MDL) and compound descriptors of the 12 PFASs

**Table S2.** Detailed information on the sampling dates, the average ambient temperature (°C), volume (m<sup>3</sup>), total suspended particulate (TSP) (µg/m<sup>3</sup>) for all the 45 air samples collected from Ny-Ålesund, Norwegian Arctic, and the slopes, intercepts, relationship coefficients ( $r^2$ ) and significant levels ( $p$ ) of the linear regression  $\log K_{SP}$  vs.  $\log p_L^\circ$  for each sample

**Table S3.** Summarized concentrations of the 12 PFASs in air and snow samples collected from Ny-Ålesund, Norwegian Arctic, and  $\log p_L^\circ$  (Pa) at 25°C

**Table S4.** Sampling date, the ambient temperature, concentrations (pg L<sup>-1</sup>) of the 12 PFASs in snow samples from the Ny-Ålesund, the Arctic

**Table S5.** Air-snow exchange fluxes of the 12 PFASs (pg m<sup>-2</sup> d<sup>-1</sup>)

**Table S6.** Snow interface-air partition coefficient ( $\log K_{SA}$ ) and correlation coefficients of the fluxes with concentrations in air and snow

**Figure S1.** Significant correlation between  $\log K_{SP}$  and  $\log p_L^\circ$  (excluding FTA 6:2 and 8:2)

**Figure S2.** Cumulative frequency of Monte Carlo analysis (10 000 times) for the 12 PFAS compounds

**Figure S3.** Significant correlation between the ambient temperature and the atmospheric concentrations of FOSEs and FOSAs

**Figure S4.** High-volume air sampling on the platform for atmospheric observatory of German station located in Ny-Ålesund (78°55'N, 11°56'E)

**Figure S5.** MX Soxhlet extractor for extracting PUF/PAD-1 column and PAD-3 column

## S1. Instrumental analysis parameters for the 12 PFASs

PFASs were analyzed using an Agilent 6890 GC - 5973 MS equipped with a 60 m SUPELCO WAX<sup>®</sup> 10 column (60 m × 0.25 mm × 1.0 μm) in selective ion monitoring (SIM) mode with positive chemical ionization (PCI). Methane was used as reagent gas for PCI and helium was used as carrier gas at a flow rate of 1.3 mL min<sup>-1</sup>. The injection volume was 2.0 μL in the pulse splitless mode. The temperature program was as follows: initial temperature 50°C hold for 2 min, increased to 70°C at a rate of 3°C/min, then increased at a rate of 10°C/min to 130°C, 20°C/min to 220°C and 120°C/min to 275°C, then held for 5 min. Finally, the temperature changed to 270°C at the rate of 10°C/min and held for 10 min.

## S2. Calculation of air-seawater gas exchange fluxes of the 12 PFASs

The calculation of air-snow exchange flux for PFASs was based on the modified Whitman two-film resistance model:

$$F_{\text{gas}} = v(C_s/K_{\text{snow-air}} - C_a)^1 \quad (1)$$

where  $F_{\text{gas}}$  is the air-snow exchange flux (pg/(s m<sup>2</sup>)),  $C_s$  (pg/m<sup>3</sup>) and  $C_a$  (pg/m<sup>3</sup>) are the concentrations of target compounds in snow and air, respectively.  $K_{\text{snow-air}}$  is the snow-air partition coefficient, and  $v$  is an exchange velocity (m/s).

$K_{\text{snow-air}}$  can be expressed by the following equation<sup>1</sup>:

$$K_{\text{snow-air}} = K_{\text{SA}} (\text{SSA}) \times \rho \quad (2)$$

where  $K_{\text{SA}}$  is the snow interface-air partition coefficient, SSA is the specific surface area (m<sup>2</sup>/kg), and  $\rho$  (kg/m<sup>3</sup>) is the density of water<sup>1</sup>.

The calculation of  $K_{\text{SA}}$  at -6.8°C was based on Lei and Wania<sup>2</sup>:

$$\log K_{\text{SA}} (-6.8^\circ\text{C}) = 3.53\Sigma\alpha_2^{\text{H}} + 3.38\Sigma\beta_2^{\text{H}} + 0.639\log L^{16} - 6.85 \quad (3)$$

where  $\Sigma\alpha_2^{\text{H}}$  is the overall or summation solute hydrogen bond acidity,  $\Sigma\beta_2^{\text{H}}$  is the overall or summation solute hydrogen bond basicity, and  $\log L^{16}$  is the solute gas-hexadecane partition coefficient. Values of  $\Sigma\alpha_2^{\text{H}}$  and  $\Sigma\beta_2^{\text{H}}$  of PFASs were calculated according to Lyakurwa et al.<sup>3</sup>, and  $\log L^{16}$  were calculated using Software SPARC.

Values of  $K_{\text{SA}}$  at different ambient temperatures can be derived from the following equation:<sup>4</sup>

$$K_i (T_2) = K_i (T_1) \exp((-\Delta H_{\text{IA}}/8.314)(1/T_2 - 1/T_1)) \quad (4)$$

and  $\Delta H_{\text{IA}}$  can be calculated as<sup>2</sup>:

$$\Delta H_{IA} = -5.07 \ln K_{IA}(15^\circ\text{C}) - 108 \quad (5)$$

$$\log K_{IA} (15^\circ\text{C}) = 3.60 \Sigma \alpha_2^H + 5.11 \Sigma \beta_2^H + 0.635 \log L^{16} - 8.47 \quad (6)$$

The exchange velocity  $v$  was expressed according to<sup>1</sup>

$$v = 1/(1/v_{\text{air}} + 1/v_{\text{snow}}) \quad (7)$$

The air side exchange velocity,  $v_{\text{air}}$ , was calculated as<sup>1</sup>

$$v_{\text{air}} = k^2 U / (\ln(z_w/z_0) \ln(z_{\text{ref}}/z_0)) \quad (8)$$

where  $k$  is the von Karman's constant (0.4),  $U$  is the wind speed (m/s),  $z_w$  is the height of the wind (10 m),  $z_{\text{ref}}$  is the reference height of the wind (2 m), and  $z_0$  is the surface roughness for snow (0.001 m).<sup>1,5</sup>

The snow side exchange velocity,  $v_{\text{snow}}$ , was calculated as<sup>1</sup>

$$v_{\text{snow}} = D_{\text{snow}} / (d/2) \quad (9)$$

$$D_{\text{snow}} = D_{ia} (1 - \rho_{\text{snow}}/\rho_{\text{ice}})^{1.5} \quad (10)$$

where  $d$  is snow thickness(m), and is density of ice ( $\text{kg/m}^3$ ). The values of  $D_{ia}$  ( $\text{cm}^2/\text{s}$ ) can be calculated based on their molar mass ( $M_i$ ) as the following equation introduced by Schwarzenbach et al.<sup>6</sup>

$$D_{ia} = 1.55/M_i^{0.65} \quad (11)$$

**Table S1.** Full names, acronyms, Chemical Abstract System (CAS) numbers, molecular weight (MW), structure, method detection limits (MDL) and compound descriptors of the 12 PFASs

| Full name                            | CAS number | Abbr.     | MDL in air (pg/m <sup>3</sup> ) | MDL in snow (pg/L) | $\Sigma\alpha_2^H$ <sup>1)</sup> | $\Sigma\beta_2^H$ <sup>1)</sup> | $\log L^{16,2)}$ (25°C) | MW (g/mol) | Structure                                                                             |
|--------------------------------------|------------|-----------|---------------------------------|--------------------|----------------------------------|---------------------------------|-------------------------|------------|---------------------------------------------------------------------------------------|
| 6:2 Fluorotelomer alcohol            | 647-42-7   | 6:2 FTOH  | 0.1                             | 1.8                | 0.59                             | 0.36                            | 2.86                    | 364.1      | 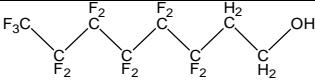   |
| 8:2 Fluorotelomer alcohol            | 678-39-7   | 8:2 FTOH  | 0.2                             | 5.9                | 0.60                             | 0.40                            | 2.91                    | 464.1      |    |
| 10:2 Fluorotelomer alcohol           | 865-86-1   | 10:2 FTOH | 0.1                             | 4.8                | 0.60                             | 0.47                            | 2.85                    | 564.1      |    |
| 12:2 Fluorotelomer alcohol           | 39239-77-5 | 12:2 FTOH | 0.1                             | 11                 | 0.61                             | 0.55                            | 2.68                    | 664.2      |    |
| 6:2 Fluorotelomer acrylate           | 17527-29-6 | 6:2 FTA   | 0.2                             | 0.8                | 0.02                             | 0.49                            | 3.40                    | 418.2      |    |
| 8:2 Fluorotelomer acrylate           | 27905-45-9 | 8:2 FTA   | 0.1                             | 1.3                | 0.02                             | 0.56                            | 3.12                    | 518.2      |   |
| N-methyl perfluorooctane sulfonamide | 31506-32-8 | MeFOSA    | 0.1                             | 2.3                | 0.33                             | 0.90                            | 2.94                    | 513.2      |  |
| N-ethyl perfluorooctane sulfonamide  | 4151-50-2  | EtFOSA    | 0.1                             | 0.8                | 0.33                             | 0.94                            | 3.42                    | 527.2      |  |

|                                             |            |        |     |     |      |      |      |       |                                                                                     |
|---------------------------------------------|------------|--------|-----|-----|------|------|------|-------|-------------------------------------------------------------------------------------|
| N-methyl perfluorobutane sulfonamide        | 68298-12-4 | MeFBSA | 0.1 | 0.1 | 0.31 | 0.84 | 2.69 | 313.1 |  |
| N-methyl perfluorooctane sulfonamidoethanol | 24448-09-7 | MeFOSE | 0.2 | 1.5 | 0.61 | 1.21 | 3.82 | 557.2 |  |
| N-ethyl perfluorooctane sulfonamidoethanol  | 1691-99-2  | EtFOSE | 0.1 | 2.1 | 0.59 | 1.25 | 4.12 | 571.3 |  |
| N-methyl perfluorobutane sulfonamidoethanol | 34454-97-2 | MeFBSE | 0.1 | 0.2 | 0.58 | 1.12 | 3.57 | 357.2 |  |

<sup>1)</sup>  $\Sigma\alpha_2^H$ : Over solute hydrogen bond acidity,  $\Sigma\beta_2^H$ : Over solute hydrogen bond basicity, calculated based on Lyakurwa et al.<sup>3</sup>

<sup>2)</sup>  $\log L^{16}$ : The solute gas-hexadecane partition coefficient, calculated using Software SPARC.

**Table S2.** Detailed information on the sampling dates, the average ambient temperature (°C), volume (m<sup>3</sup>), total suspended particulate (TSP) (µg/m<sup>3</sup>) for all the 45 air samples collected from Ny-Ålesund, Norwegian Arctic, and the slopes, intercepts, relationship coefficients ( $r^2$ ) and significant levels ( $p$ ) of the linear regression  $\log K_{SP}$  vs.  $\log p_L^\circ$  for each sample

| Samples    | Sampling date     | Temp. (°C)  | Volume (m <sup>3</sup> ) | TSP (µg/m <sup>3</sup> ) | Slope        | Intercept    | $r^2$       | $p$         |
|------------|-------------------|-------------|--------------------------|--------------------------|--------------|--------------|-------------|-------------|
| A1         | 27.9.2011         | 0.6         | 2580                     | 5.9                      | -0.32        | -2.25        | 0.74        | < 0.05      |
| A2         | 4.10.2011         | -5.0        | 2539                     | 8.5                      | -0.28        | -1.7         | 0.49        | < 0.05      |
| A3         | 11.10.2011        | -3.6        | 2573                     | 20.2                     | -0.35        | -2.28        | 0.84        | < 0.05      |
| A4         | 25.10.2011        | -3.9        | 2505                     | 9.6                      | -0.48        | -1.96        | 0.81        | < 0.05      |
| A5         | 1.11.2011         | -3.9        | 2694                     | 2.3                      | -0.21        | -1.81        | 0.83        | < 0.05      |
| A6         | 9.11.2011         | -9.4        | 1613                     | 5.6                      | -0.34        | -2.15        | 0.87        | < 0.05      |
| <b>A7</b>  | <b>16.11.2011</b> | <b>-6.7</b> | <b>2468</b>              | <b>2.9</b>               | <b>-0.18</b> | <b>-1.7</b>  | <b>0.33</b> | <b>0.08</b> |
| A8         | 23.11.2011        | -8.2        | 4668                     | 20.1                     | -0.53        | -2.33        | 0.85        | < 0.05      |
| A9         | 6.12.2011         | -6.4        | 2529                     | 6.4                      | -0.44        | -1.4         | 0.74        | < 0.05      |
| A10        | 13.12.2011        | -4.6        | 3178                     | 3.9                      | -0.42        | -1.64        | 0.74        | < 0.05      |
| A11        | 22.12.2011        | -7.2        | 2888                     | 8.6                      | -0.41        | -1.71        | 0.75        | < 0.05      |
| A12        | 30.12.2011        | -4.5        | 2368                     | 10.2                     | -0.63        | -1.67        | 0.86        | < 0.05      |
| <b>A13</b> | <b>5.1.2012</b>   | <b>-5.8</b> | <b>2635</b>              | <b>5.0</b>               | <b>-0.26</b> | <b>-1.31</b> | <b>0.33</b> | <b>0.08</b> |
| A14        | 12.1.2012         | -2.5        | 3193                     | 3.6                      | -0.18        | -1.46        | 0.47        | < 0.05      |
| A15        | 21.1.2012         | -4.2        | 2725                     | 2.1                      | -0.23        | -1.52        | 0.51        | < 0.05      |
| A16        | 28.1.2012         | -3.0        | 2139                     | 3.6                      | -0.24        | -1.42        | 0.44        | < 0.05      |
| <b>A17</b> | <b>4.2.2012</b>   | <b>-7.0</b> | <b>2968</b>              | <b>2.1</b>               | <b>-0.18</b> | <b>-1.75</b> | <b>0.34</b> | <b>0.08</b> |
| A18        | 13.2.2012         | -8.5        | 3014                     | 3.3                      | -0.35        | -1.66        | 0.68        | < 0.05      |
| A19        | 21.2.2012         | -7.0        | 3016                     | 6.3                      | -0.39        | -1.89        | 0.77        | < 0.05      |
| A20        | 29.2.2012         | -2.7        | 3144                     | 7.0                      | -0.26        | -2.2         | 0.74        | < 0.05      |
| A21        | 9.3.2012          | -6.1        | 3584                     | 6.2                      | -0.24        | -1.99        | 0.54        | < 0.05      |

|            |                  |             |             |             |              |              |             |             |
|------------|------------------|-------------|-------------|-------------|--------------|--------------|-------------|-------------|
| A22        | 19.3.2012        | -7.5        | 5165        | 7.9         | -0.5         | -1.78        | 0.8         | < 0.05      |
| A23        | 2.4.2012         | -11.3       | 3434        | 5.2         | -0.47        | -1.8         | 0.84        | < 0.05      |
| A24        | 11.4.2012        | -9.9        | 2677        | 4.2         | -0.37        | -1.69        | 0.81        | < 0.05      |
| A25        | 18.4.2012        | -8.1        | 3031        | 5.9         | -0.23        | -1.94        | 0.74        | < 0.05      |
| A26        | 26.4.2012        | -5.3        | 3290        | 12.4        | -0.32        | -2.31        | 0.83        | < 0.05      |
| A27        | 5.5.2012         | -2.5        | 3309        | 4.7         | -0.45        | -1.78        | 0.79        | < 0.05      |
| <b>A28</b> | <b>14.5.2012</b> | <b>-1.3</b> | <b>2710</b> | <b>3.7</b>  | <b>-0.15</b> | <b>-1.76</b> | <b>0.35</b> | <b>0.07</b> |
| A29        | 23.5.2012        | 1.6         | 2338        | 17.6        | -0.61        | -1.92        | 0.96        | < 0.05      |
| A30        | 30.5.2012        | 1.5         | 3013        | 10.1        | -0.57        | -1.94        | 0.82        | < 0.05      |
| A31        | 7.6.2012         | 3.1         | 2536        | 4.8         | -0.48        | -1.57        | 0.74        | < 0.05      |
| A32        | 13.6.2012        | 4.8         | 2652        | 7.2         | -0.48        | -2.02        | 0.77        | < 0.05      |
| A33        | 21.6.2012        | 4.5         | 2548        | 26.6        | -0.47        | -2.55        | 0.76        | < 0.05      |
| A34        | 28.6.2012        | 5.5         | 2046        | 22.0        | -0.4         | -2.45        | 0.67        | < 0.05      |
| A35        | 4.7.2012         | 6.1         | 2383        | 15.5        | -0.36        | -2.04        | 0.58        | < 0.05      |
| A36        | 11.7.2012        | 6.6         | 2506        | 13.1        | -0.35        | -2.16        | 0.62        | < 0.05      |
| A37        | 18.7.2012        | 6.7         | 2474        | 20.0        | -0.45        | -2.57        | 0.72        | < 0.05      |
| A38        | 25.7.2012        | 5.1         | 2187        | 3.1         | -0.36        | -1.32        | 0.49        | < 0.05      |
| A39        | 1.8.2012         | 5.0         | 2372        | 40.0        | -0.47        | -2.33        | 0.64        | < 0.05      |
| A40        | 8.8.2012         | 6.0         | 2594        | 17.3        | -0.42        | -2.31        | 0.65        | < 0.05      |
| A41        | 15.8.2012        | 4.0         | 2099        | 30.3        | -0.4         | -2.16        | 0.53        | < 0.05      |
| A42        | 22.8.2012        | 4.3         | 2320        | 9.2         | -0.36        | -1.64        | 0.49        | < 0.05      |
| A43        | 29.8.2012        | 3.3         | 2616        | 16.6        | -0.4         | -1.89        | 0.59        | < 0.05      |
| A44        | 14.9.2012        | 5.5         | 2324        | 7.4         | -0.45        | -1.46        | 0.62        | < 0.05      |
| <b>A45</b> | <b>21.9.2012</b> | <b>-1.7</b> | <b>2077</b> | <b>21.0</b> | <b>-0.18</b> | <b>-2.17</b> | <b>0.3</b>  | <b>0.1</b>  |



**Table S3.** Summarized concentrations of the 12 PFASs in air and snow samples collected from Ny-Ålesund, Norwegian Arctic, and  $\log p^{\circ}_L$  (Pa) at 25°C

| Compounds        | $\log p^{\circ}_L$<br>(Pa, 25°C) | air (pg m <sup>-3</sup> ) |     |     |      |         | snow (pg L <sup>-1</sup> ) |     |     |     |         |
|------------------|----------------------------------|---------------------------|-----|-----|------|---------|----------------------------|-----|-----|-----|---------|
|                  |                                  | ave.                      | std | max | min  | %ΣPFASs | ave.                       | std | max | min | %ΣPFASs |
| <b>6:2 FTOH</b>  | 1.94                             | 2.1                       | 0.8 | 5.1 | 0.6  | 12.7    | 4.2                        | 1.6 | 6.6 | 1.5 | 0.8     |
| <b>8:2 FTOH</b>  | 1.61                             | 10                        | 4.0 | 25  | 3.7  | 60.8    | 236                        | 82  | 360 | 114 | 45.1    |
| <b>10:2 FTOH</b> | 1.35                             | 2.0                       | 1.6 | 9.3 | 0.4  | 12.0    | 95                         | 53  | 148 | 20  | 18.2    |
| <b>12:2 FTOH</b> | 1.09                             | 0.8                       | 0.6 | 3.3 | 0.3  | 4.8     | 34                         | 16  | 72  | 15  | 6.5     |
| <b>6:2 FTA</b>   | 1.67                             | 0.1                       | 0   | 0.1 | <0.1 | 0.0     | 3.9                        | 1.8 | 6.4 | 1.4 | 0.7     |
| <b>8:2 FTA</b>   | 1.34                             | 0.1                       | 0.1 | 0.4 | <0.1 | 0.6     | 5.3                        | 2.5 | 8.7 | 1.7 | 1.0     |
| <b>MeFOSA</b>    | 1.18                             | 0.3                       | 0.1 | 0.5 | 0.1  | 1.8     | 5.3                        | 4.4 | 17  | 2.3 | 1.0     |
| <b>EtFOSA</b>    | 0.82                             | 0.2                       | 0.1 | 0.5 | 0.1  | 1.2     | 4.0                        | 2.0 | 7.8 | 1.4 | 0.8     |
| <b>MeFBSA</b>    | 1.95                             | 0.6                       | 0.5 | 1.8 | 0.1  | 3.6     | 26                         | 22  | 57  | 0.8 | 5.0     |
| <b>MeFOSE</b>    | -1.39                            | 0.2                       | 0.2 | 0.8 | <0.1 | 1.2     | 57                         | 29  | 96  | 17  | 10.9    |
| <b>EtFOSE</b>    | -1.76                            | 0.1                       | 0.1 | 0.4 | <0.1 | 0.6     | 23                         | 13  | 43  | 7.1 | 4.4     |
| <b>MeFBSE</b>    | -0.62                            | 0.1                       | 0   | 0.2 | <0.1 | 0.6     | 29                         | 7.4 | 41  | 19  | 5.5     |
| <b>ΣPFASs</b>    |                                  | 17                        | 6.3 | 39  | 6.7  |         | 523                        | 141 | 692 | 334 |         |

**Table S4.** Sampling date, the ambient temperature, concentrations ( $\mu\text{g L}^{-1}$ ) of the 12 PFASs in snow samples from the Ny-Ålesund, the Arctic

| samples | FTOH 6:2 | FTOH 8:2 | FTOH 10:2 | FTOH 12:2 | FTA 6:2 | FTA 8:2 | MeFOSA | EtFOSA | MeFBSA | MeFOSE | EtFOSE | MeFBSE | sum | date      | <i>t</i> (°C) |
|---------|----------|----------|-----------|-----------|---------|---------|--------|--------|--------|--------|--------|--------|-----|-----------|---------------|
| S1      | 4.8      | 146      | 139       | 27        | 6.4     | 8.4     | 3.6    | 1.4    | 5.4    | 56     | 23     | 32     | 454 | 2012/1/31 | -1.6          |
| S2      | 1.5      | 114      | 87        | 15        | 1.4     | 1.7     | 4.4    | 3.5    | 10     | 69     | 28     | 24     | 361 | 2012/1/31 | -1.6          |
| S3      | 4.8      | 251      | 148       | 25        | 4.9     | 3.7     | 3.3    | 2.1    | 52     | 76     | 26     | 27     | 624 | 2012/2/2  | -3.4          |
| S4      | 6.6      | 237      | 148       | 31        | 5.7     | 3.5     | 3.7    | 4.8    | 57     | 94     | 43     | 30     | 662 | 2012/2/4  | -3.1          |
| S5      | 4.8      | 314      | 135       | 23        | 2.5     | 8.1     | 3.5    | 3.7    | 23     | 96     | 41     | 37     | 692 | 2012/5/18 | -1.5          |
| S6      | 2.6      | 211      | 22        | 32        | 2.4     | 3.8     | 2.3    | 2.4    | 7.7    | 17     | 11     | 19     | 334 | 2012/5/21 | -1.5          |
| S7      | 3.5      | 310      | 20        | 42        | 3.2     | 5.1     | 5.2    | 5.6    | 41     | 39     | 18     | 41     | 533 | 2012/5/23 | -1.6          |
| S8      | 5.9      | 183      | 45        | 72        | 5.4     | 8.7     | 4.6    | 5.0    | 0.8    | 30     | 12     | 20     | 392 | 2012/5/24 | -0.5          |
| S9      | 3.2      | 360      | 105       | 39        | 2.9     | 4.7     | 17     | 7.8    | 41     | 35     | 7.1    | 30     | 652 | 2012/5/22 | -1            |

**Table S5.** Air-snow exchange fluxes of the 12 PFASs ( $\mu\text{g m}^{-2} \text{d}^{-1}$ )

| samples | 6:2 FTOH | 8:2 FTOH | 10:2 FTOH | 12:2 FTOH | 6:2 FTA | 8:2 FTA | MeFOSA | EtFOSA | MeFBSA | MeFOSE | EtFOSE | MeFBSE | Sum |
|---------|----------|----------|-----------|-----------|---------|---------|--------|--------|--------|--------|--------|--------|-----|
| S1      | 1.22     | 49.72    | 28.96     | 3.19      | 66.05   | 68.03   | 0.15   | -0.02  | 0.99   | -0.03  | -0.01  | -0.05  | 218 |
| S2      | -1.09    | 37.70    | 17.93     | 1.64      | 14.11   | 14.16   | 0.20   | 0.03   | 2.13   | -0.02  | -0.01  | -0.05  | 87  |
| S3      | 1.17     | 88.55    | 30.83     | 2.92      | 50.67   | 30.03   | 0.12   | -0.01  | 11.77  | -0.02  | -0.01  | -0.05  | 216 |
| S4      | 2.42     | 83.31    | 30.70     | 3.60      | 59.23   | 28.61   | 0.15   | 0.06   | 12.97  | -0.02  | -0.01  | -0.05  | 221 |
| S5      | 1.98     | 96.01    | 24.38     | 2.31      | 25.57   | 65.61   | -0.35  | -0.24  | 4.74   | -0.07  | -0.03  | -0.19  | 220 |
| S6      | 0.44     | 57.37    | 0.66      | 3.43      | 24.75   | 30.85   | -0.42  | -0.27  | 1.14   | -0.08  | -0.03  | -0.20  | 118 |
| S7      | -1.94    | 99.55    | -0.04     | 4.52      | 33.00   | 41.37   | 0.08   | -0.02  | 7.65   | -0.05  | -0.02  | -0.04  | 184 |
| S8      | 2.72     | 46.89    | 5.53      | 8.56      | 56.30   | 70.40   | -0.28  | -0.22  | -0.46  | -0.08  | -0.03  | -0.20  | 189 |
| S9      | -2.12    | 118.06   | 17.86     | 4.09      | 30.41   | 38.12   | 0.85   | 0.03   | 7.60   | -0.05  | -0.02  | -0.05  | 215 |

**Table S6.** Snow interface-air partition coefficient ( $\log K_{SA}$ ) and correlation coefficients of the fluxes with concentrations in air and snow

| Compounds | $\log K_{SA}$ | $r_a^2$ * | $r_s^2$ * |
|-----------|---------------|-----------|-----------|
| 6:2 FTOH  | -1.71         | 0.32      | 0.63      |
| 8:2 FTOH  | -1.52         | 0.10      | 0.95      |
| 10:2 FTOH | -1.32         | 0.54      | 0.99      |
| 12:2 FTOH | -1.15         | 0.41      | 0.99      |
| 6:2 FTA   | -2.93         | 0.24      | 0.99      |
| 8:2 FTA   | -2.88         | 0.01      | 0.99      |
| MeFOSA    | -0.79         | 0.37      | 0.71      |
| EtFOSA    | -0.33         | 0.86      | 0.13      |
| MeFBSA    | -1.20         | 0.03      | 0.98      |
| MeFOSE    | 1.82          | 0.96      | 0.19      |
| EtFOSE    | 2.10          | 0.98      | 0.10      |
| MeFBSE    | 1.29          | 0.99      | 0.02      |

\* $r_a^2$ : correlation coefficients of the fluxes with concentrations in air.

$r_s^2$ : correlation coefficients of the fluxes with concentrations in snow.

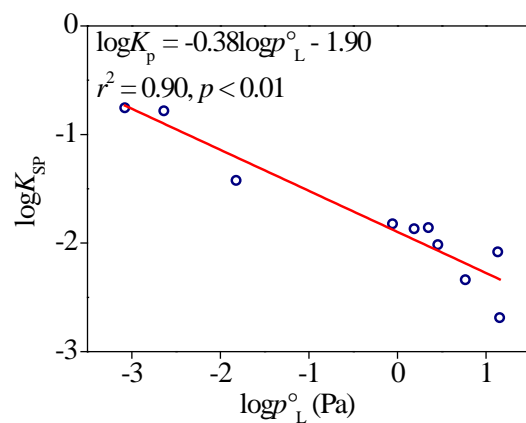

**Figure S1.** Significant correlation between  $\log K_{SP}$  and  $\log p_L$  (excluding FTA 6:2 and 8:2)

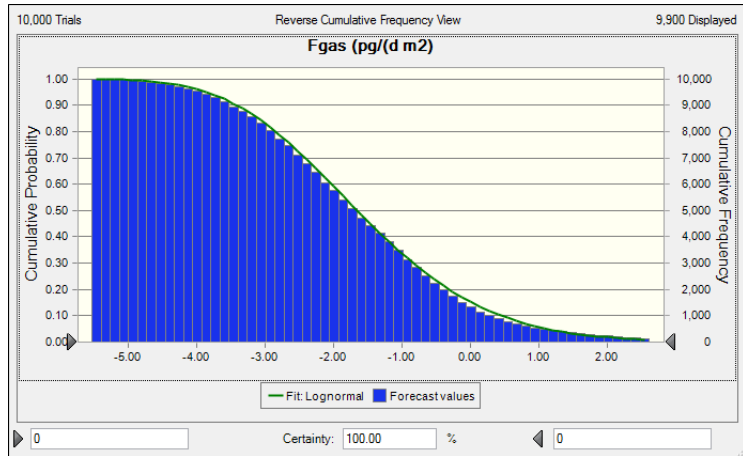

6:2 FTOH

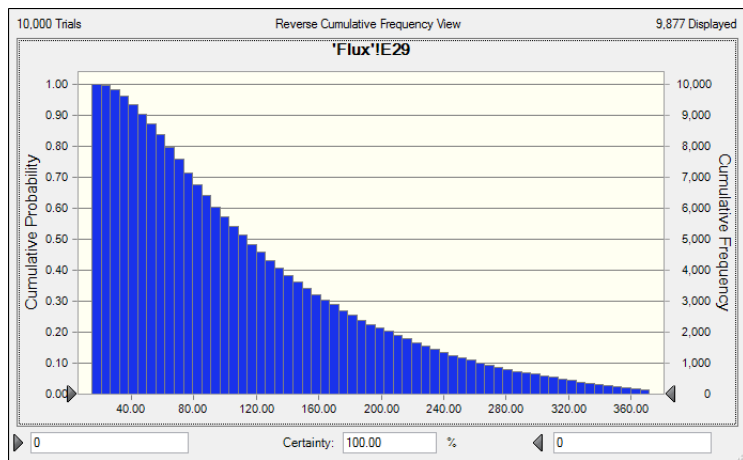

8:2 FTOH

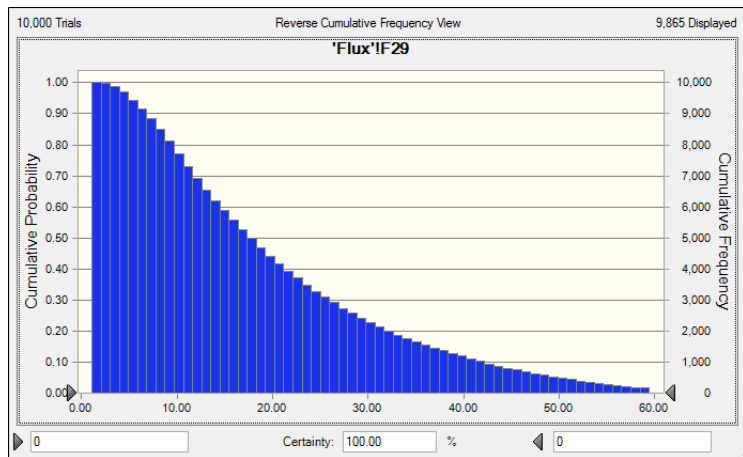

10:2 FTOH

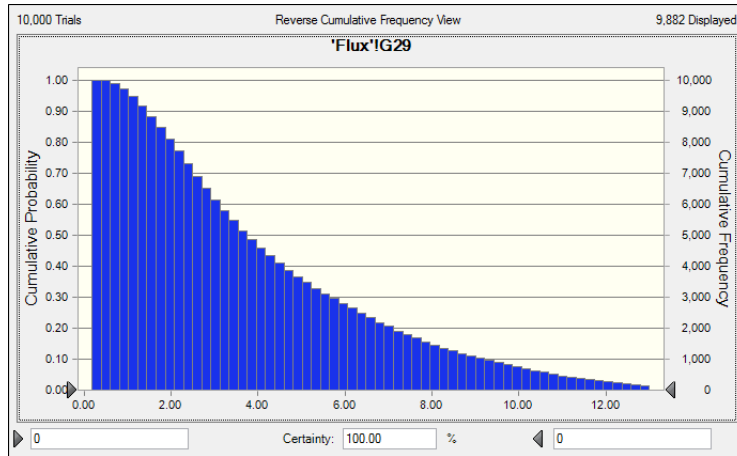

12:2 FTOH

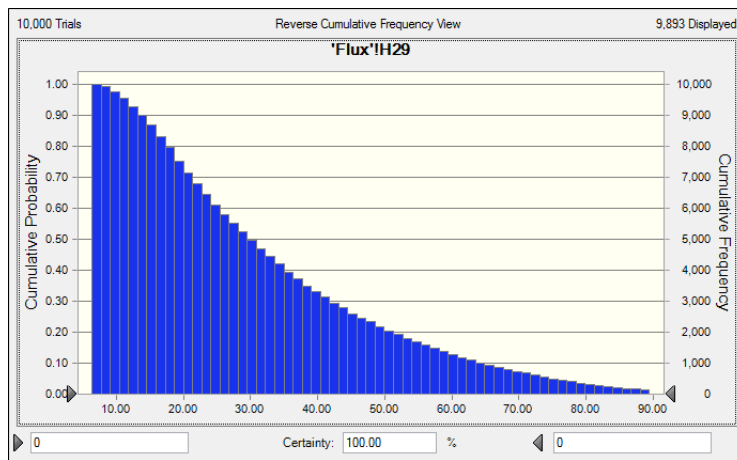

6:2 FTA

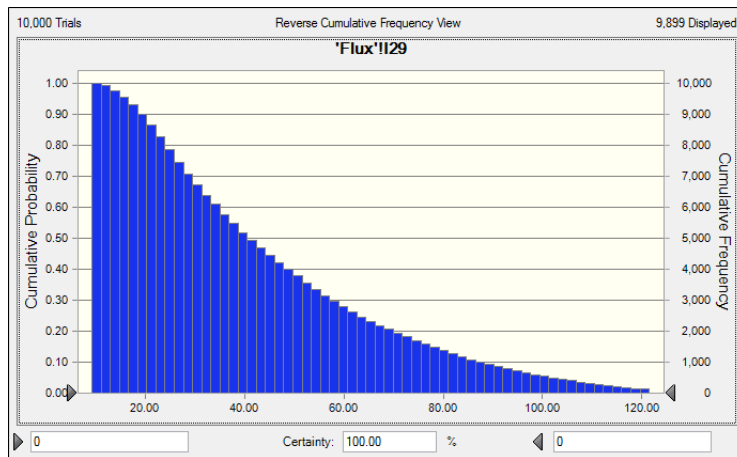

8:2 FTA

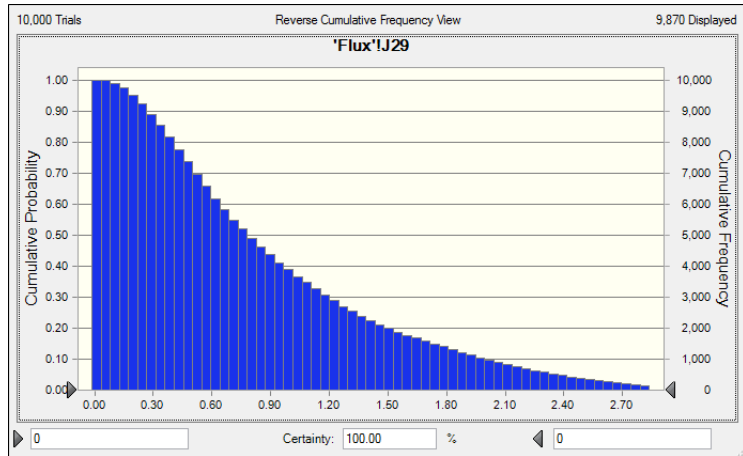

MeFOSA

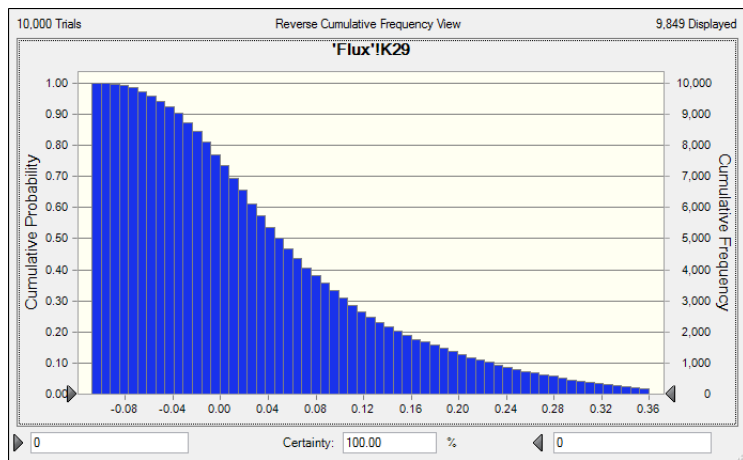

EtFOSA

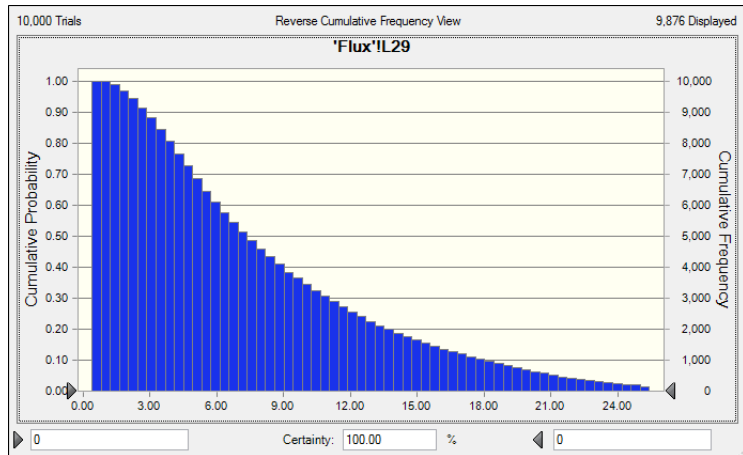

MeFBSA



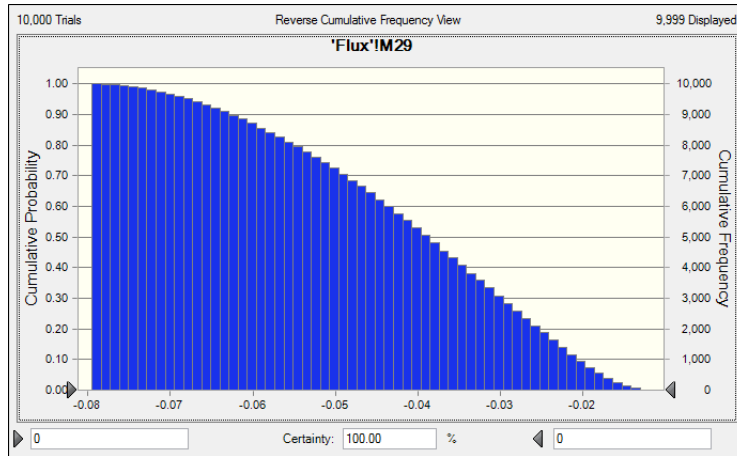

MeFOSE

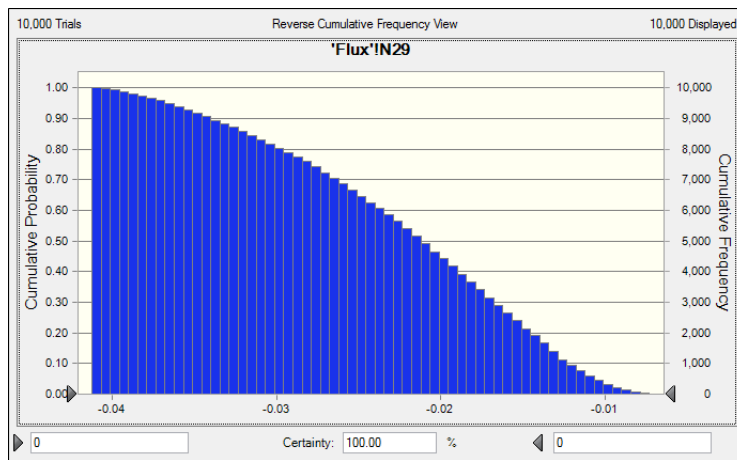

EtFOSE

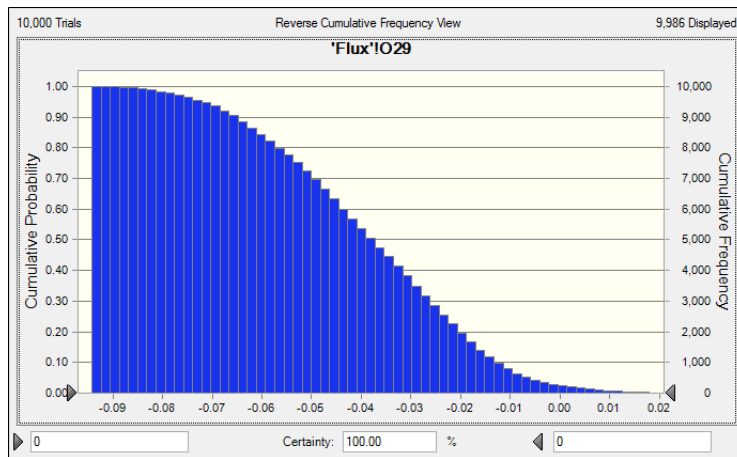

MeFBSE

**Figure S2.** Cumulative frequency of Monte Carlo analysis (10 000 times) for the 12 PFAS compounds

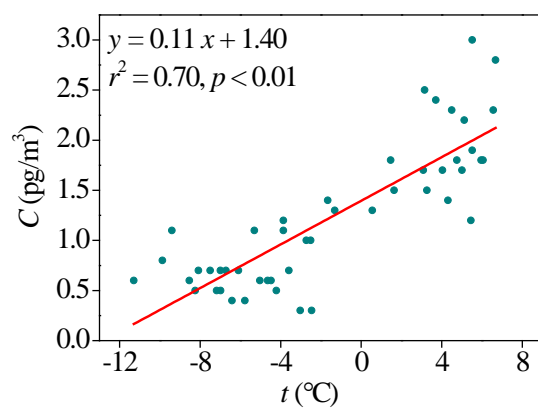

**Figure S3.** Significant correlation between the ambient temperature and the atmospheric concentrations of FOSEs and FOSAs

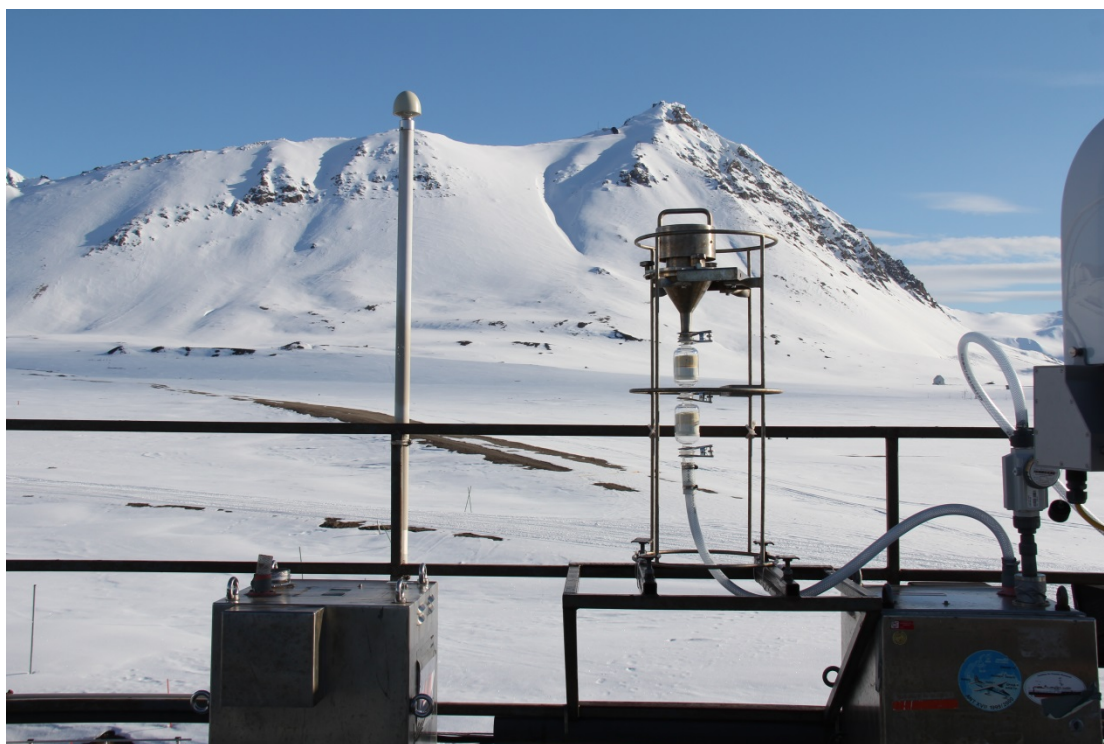

**Figure S4.** High-volume air sampling on the platform for atmospheric observatory of German station located in Ny-Ålesund ( $78^{\circ}55' \text{N}$ ,  $11^{\circ}56' \text{E}$ )

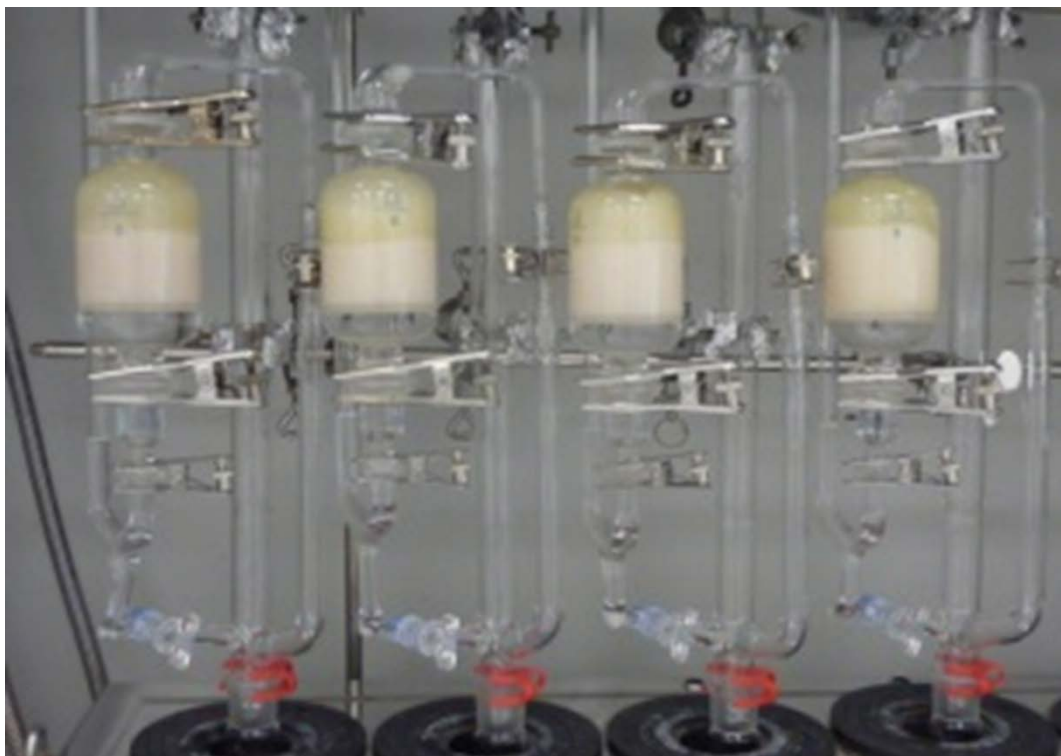

**Figure S5.** MX Soxhlet extractor for extracting PUF/PAD-1 column and PAD-3 column.

## References

1. Hansen KM, Halsall CJ, Christensen JH. A dynamic model to study the exchange of gas-phase persistent organic pollutants between air and a seasonal snowpack. *Environmental science & technology* **40**, 2644-2652 (2006).
2. Lei YD, Wania F. Is rain or snow a more efficient scavenger of organic chemicals? *Atmospheric Environment* **38**, 3557-3571 (2004).
3. Lyakurwa FS, Yang X, Li X, Qiao X, Chen J. Development of In Silico Models for Predicting LSER Molecular Parameters and for Acute Toxicity Prediction to Fathead Minnow (*Pimephales Promelas*). *Chemosphere* **108**, 17-25 (2014).
4. Schwarzenbach RP, Gschwend PM, Imboden DM. Environmental organic chemistry (Second Edition) [M]. New Jersey: A John Wiley & Sons, Inc. Eq. 3-51 (2003).
5. Seinfeld JH, Pandis SN. Atmospheric chemistry and physics: From air pollution to climate change; John Wiley & Sons: New York. (1998).
6. Schwarzenbach RP, Gschwend PM, Imboden DM. Environmental organic chemistry (Second Edition) [M]. New Jersey: A John Wiley & Sons, Inc. Fig. 18.19 (2003).
